# Supplementary material
Source: PubMed Central journal article supplement (PMC3611587)
Supplement: NIHMS401165-supplement-01.pdf [file NIHMS401165-supplement-01.pdf]

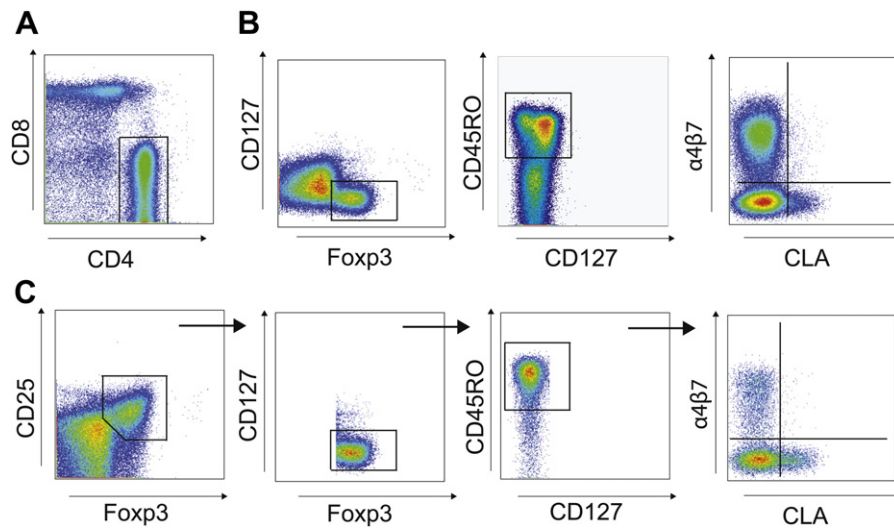

**Supplementary Figure E1.** Identification of CLA<sup>+</sup> and  $\alpha 4\beta 7$ <sup>+</sup> Tregs using 10-color multiparametric flow cytometry. **(A)** Peripheral blood mononuclear cells were isolated at the time of neutrophil recovery after allogeneic hematopoietic cell transplantation. Cells staining with the viability marker or CD14 were excluded and CD3<sup>+</sup> cells were selected (data not shown). Live CD4<sup>+</sup>CD8<sup>-</sup> T cells were identified for additional immunophenotyping. **(B)** The total CD4<sup>+</sup> T-cell population (from **A**) was used to generate serial two-parameter comparisons between Foxp3 and CD127, CD45RO and CD127, and  $\alpha 4\beta 7$  and CLA. **(C)** CD25<sup>+</sup>Foxp3<sup>+</sup> Tregs were isolated from the CD4<sup>+</sup> population (**A**). The gating strategies generated from **(B)** were then sequentially applied to the CD25<sup>+</sup>Foxp3<sup>+</sup> Treg population to determine percentages of Treg tissue-homing subsets.
